# Supplementary material
Source: Springer Nature journal article supplement (https://www.springermedizin.de/resource/supplementary/12887_2013_872_MOESM3_ESM.pdf/9475964)
Supplement: MOESM3 [file 9475964]

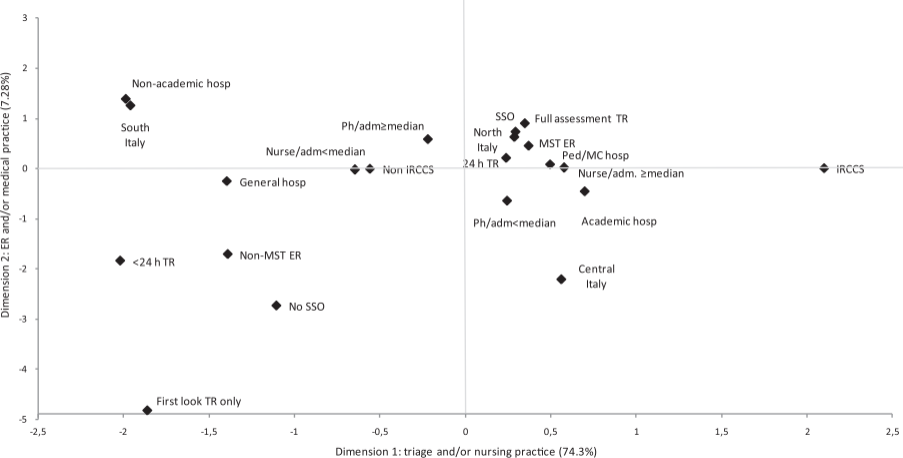

Abbreviations: hosp (hospital), Ph (physician), adm (annual admissions), SSO (Short Stay Observation), TR (triage), ER (emergency room), MST (medico-surgical-traumatological), Ped MC (pediatric or maternal and child), IRCCS (Italian clinical research institute)
